# Supplementary material for: Electrostatic properties of nine fluoroquinoloneantibiotics derived directly from their crystal structure refinements
Source: Royal Society of Chemistry journal article supplement (doi:10.1039/c1ce05966a), 2011-12-02
Supplement: c1ce05966a.pdf [file c1ce05966a.pdf]

## Supplementary information: Electrostatic properties of nine fluoroquinolone antibiotics derived directly from their crystal structures

Julian J. Holstein, Christian B. Hübschle and Birger Dittrich\*

### Crystallization Conditions

| Structure                           | Solvent      | Method                       |
|-------------------------------------|--------------|------------------------------|
| enoxacin 1.72 H <sub>2</sub> O      | water        | vapor diffusion with ethanol |
| lomefloxacin 2 H <sub>2</sub> O HCl | water        | vapor diffusion with acetone |
| nadifloxacin 0.5 H <sub>2</sub> O   | acetonitrile | slow evaporation             |
| norfloxacin 2 H <sub>2</sub> O      | water        | slow evaporation             |
| norfloxacin anhydrate               | methanol     | slow evaporation             |
| ofloxacin anhydrate                 | acetonitrile | slow evaporation             |

Table 1: Crystallization conditions of measured fluoroquinolone solvates.

### Refinement Details

For all datasets figures of merit (FOM) are given for three models.

- IAM refinement with SHELXL
- IAM refinement with XD
- invariom refinement with XD

The influence of the weighting scheme was also investigated. For the high-quality datasets of ciprofloxacin, enoxacin, nadifloxacin and ofloxacin anhydrate a weighting scheme of  $w = 1/\sigma^2(F_o^2)$  gave the best weighted  $R$ -factor. A SHELXL-type weighting scheme was used for the other structures. Based on the values  $a$  and  $b$  (see equation 1) from IAM, refinement weight parameters were manually adjusted for invariom refinement with the program DRKPLOT, which is implemented in the program WINGX (for reference see experimental section of paper). Weighting parameters employed in the refinements are given in the tables below. Rather than having different  $\Delta\rho_{min}$  and  $\Delta\rho_{max}$  values, we report the range of the residual density features as  $|\Delta\rho_{min}| + \Delta\rho_{max}$ .

$$w = \frac{1}{\sigma^2(F_o^2) + (aP)^2 + bP} \quad \text{with} \quad P = \frac{2F_c^2 + \text{Max}(F_o^2, 0)}{3} \quad (1)$$

|             |                                         | ciprofloxacin      |                         |                         |                      |                         |                         |
|-------------|-----------------------------------------|--------------------|-------------------------|-------------------------|----------------------|-------------------------|-------------------------|
| Measurement | Solvate                                 | 6 H <sub>2</sub> O |                         |                         | HCl                  |                         |                         |
|             | Space group                             | P $\bar{1}$        |                         |                         | P(2) <sub>1</sub> /c |                         |                         |
|             | Temperature                             | 100 K              |                         |                         | 100 K                |                         |                         |
|             | $\lambda$ [Å]                           | 0.71073            |                         |                         | 0.7660               |                         |                         |
|             | Resolution [sin $\Theta$ / $\lambda$ ]  | 1.16               |                         |                         | 0.78                 |                         |                         |
|             | Resolution [d]                          | 0.43               |                         |                         | 0.64                 |                         |                         |
| Refinement  |                                         | <i>SHELX</i>       | <i>XD<sub>IAM</sub></i> | <i>XD<sub>INV</sub></i> | <i>SHELX</i>         | <i>XD<sub>IAM</sub></i> | <i>XD<sub>INV</sub></i> |
|             | weighting a                             | 0.0580             | 0.0580                  | —                       | 0.0564               | 0.0564                  | 0.001                   |
|             | weighting b                             | 0.0743             | 0.0743                  | —                       | 1.5709               | 1.5709                  | 1.50                    |
|             | R(F)                                    | 0.0313             | 0.0315                  | 0.0205                  | 0.0427               | 0.0420                  | 0.0339                  |
|             | R <sub>all</sub> (F)                    | 0.0391             | 0.0462                  | 0.0352                  | 0.0463               | 0.0473                  | 0.0392                  |
|             | GoFw                                    | 1.064              | 1.2705                  | 2.5770                  | 0.926                | 1.0076                  | 0.9541                  |
|             | $ \Delta\rho_{min}  + \Delta\rho_{max}$ | 0.96               | 1.08                    | 0.72                    | 1.64                 | 1.58                    | 1.57                    |

Table 2: Measurements and structure refinements of ciprofloxacin solvates 6 H<sub>2</sub>O and HCl

|             |                                         | enoxacin             |                         |                         |                      |                         |                         |
|-------------|-----------------------------------------|----------------------|-------------------------|-------------------------|----------------------|-------------------------|-------------------------|
| Measurement | Solvate                                 | 1.7 H <sub>2</sub> O |                         |                         | 3 H <sub>2</sub> O   |                         |                         |
|             | Space group                             | P2 <sub>1</sub> /c   |                         |                         | P(2) <sub>1</sub> /c |                         |                         |
|             | Temperature                             | 100 K                |                         |                         | 100 K                |                         |                         |
|             | $\lambda$ [Å]                           | 0.71073              |                         |                         | 0.71073              |                         |                         |
|             | Resolution [sin $\Theta$ / $\lambda$ ]  | 1.02                 |                         |                         | 0.65                 |                         |                         |
|             | Resolution [d]                          | 0.49                 |                         |                         | 0.77                 |                         |                         |
| Refinement  |                                         | <i>SHELX</i>         | <i>XD<sub>IAM</sub></i> | <i>XD<sub>INV</sub></i> | <i>SHELX</i>         | <i>XD<sub>IAM</sub></i> | <i>XD<sub>INV</sub></i> |
|             | weighting a                             | 0.0594               | 0.0594                  | —                       | 0.0526               | 0.0526                  | 0.0400                  |
|             | weighting b                             | 0.4430               | 0.4430                  | —                       | 0.3952               | 0.3952                  | 0.0001                  |
|             | R(F)                                    | 0.0414               | 0.0376                  | 0.0276                  | 0.0369               | 0.0346                  | 0.0256                  |
|             | R <sub>all</sub> (F)                    | 0.0704               | 0.0873                  | 0.0782                  | 0.0518               | 0.0589                  | 0.0500                  |
|             | GoFw                                    | 1.077                | 1.3574                  | 2.8305                  | 1.014                | 1.0740                  | 1.0829                  |
|             | $ \Delta\rho_{min}  + \Delta\rho_{max}$ | 1.21                 | 1.07                    | 0.65                    | 0.49                 | 0.51                    | 0.30                    |

Table 3: Measurements and structure refinements of enoxacin solvates 1.7 H<sub>2</sub>O and 3 H<sub>2</sub>O

|             |                                         | norfloxacin        |                         |                         |              |                         |                         |
|-------------|-----------------------------------------|--------------------|-------------------------|-------------------------|--------------|-------------------------|-------------------------|
| Measurement | Solvate                                 | 2 H <sub>2</sub> O |                         |                         | —            |                         |                         |
|             | Space group                             | P2 <sub>1</sub> /c |                         |                         | P $\bar{1}$  |                         |                         |
|             | Temperature                             | 100 K              |                         |                         | 100 K        |                         |                         |
|             | $\lambda$ [Å]                           | 0.71073            |                         |                         | 1.5418       |                         |                         |
|             | Resolution [sin $\Theta$ / $\lambda$ ]  | 0.77               |                         |                         | 0.60         |                         |                         |
|             | Resolution [d]                          | 0.65               |                         |                         | 0.84         |                         |                         |
| Refinement  |                                         | <i>SHELX</i>       | <i>XD<sub>IAM</sub></i> | <i>XD<sub>INV</sub></i> | <i>SHELX</i> | <i>XD<sub>IAM</sub></i> | <i>XD<sub>INV</sub></i> |
|             | weighting a                             | 0.0767             | 0.0767                  | 0.04                    | 0.1322       | 0.1322                  | 0.1322                  |
|             | weighting b                             | 0.8569             | 0.8569                  | 0.03                    | 2.6093       | 2.6093                  | 2.6093                  |
|             | R(F)                                    | 0.0486             | 0.0445                  | 0.0337                  | 0.0992       | 0.0953                  | 0.0937                  |
|             | R <sub>all</sub> (F)                    | 0.0957             | 0.1095                  | 0.0998                  | 0.1062       | 0.1166                  | 0.1176                  |
|             | GoFw                                    | 1.022              | 0.3972                  | 0.9315                  | 1.102        | 0.4654                  | 0.4432                  |
|             | $ \Delta\rho_{min}  + \Delta\rho_{max}$ | 1.06               | 1.00                    | 0.84                    | 0.94         | 1.14                    | 1.25                    |

Table 4: Measurements and structure refinements of Norfloxacin 2 H<sub>2</sub>O and Norfloxacin anhydrate

|             |                                         | floxacin             |                         |                         | lomefloxacin           |                         |                         |
|-------------|-----------------------------------------|----------------------|-------------------------|-------------------------|------------------------|-------------------------|-------------------------|
| Measurement | Solvate                                 | H <sub>2</sub> O HCl |                         |                         | 2 H <sub>2</sub> O HCl |                         |                         |
|             | Space group                             | P2 <sub>1</sub> /c   |                         |                         | P2 <sub>1</sub> /c     |                         |                         |
|             | Temperature                             | 298K                 |                         |                         | 100 K                  |                         |                         |
|             | $\lambda$ [Å]                           | 0.71073              |                         |                         | 0.80000                |                         |                         |
|             | Resolution [sin $\Theta$ / $\lambda$ ]  | 0.60                 |                         |                         | 0.54                   |                         |                         |
|             | Resolution [d]                          | 0.84                 |                         |                         | 0.92                   |                         |                         |
| Refinement  |                                         | <i>SHELX</i>         | <i>XD<sub>IAM</sub></i> | <i>XD<sub>INV</sub></i> | <i>SHELX</i>           | <i>XD<sub>IAM</sub></i> | <i>XD<sub>INV</sub></i> |
|             | weighting a                             | 0.0585               | 0.0585                  | 0.04                    | 0.1124                 | —                       | —                       |
|             | weighting b                             | 0.00                 | 0.00                    | 0.01                    | 3.98                   | —                       | —                       |
|             | R(F)                                    | 0.0380               | 0.0343                  | 0.0280                  | 0.0706                 | 0.0694                  | 0.0703                  |
|             | R <sub>all</sub> (F)                    | 0.0669               | 0.0818                  | 0.0756                  | 0.0623                 | 0.0722                  | 0.0737                  |
|             | GoFw                                    | 0.956                | 1.0105                  | 0.9934                  | 1.310                  | 3.802                   | 3.910                   |
|             | $ \Delta\rho_{min}  + \Delta\rho_{max}$ | 0.54                 | 0.48                    | 0.53                    | 0.81                   | 0.85                    | 0.76                    |

Table 5: Measurements and structure refinements of floxacin H<sub>2</sub>O HCl and lomefloxacin 4 H<sub>2</sub>O HCl

|             |                                         | sparfloxacin       |                         |                         | moxifloxacin                                                              |                         |                         |
|-------------|-----------------------------------------|--------------------|-------------------------|-------------------------|---------------------------------------------------------------------------|-------------------------|-------------------------|
| Measurement | Solvate                                 | 3 H <sub>2</sub> O |                         |                         | HCl 0.5 H <sub>2</sub> O 0.5 CH <sub>3</sub> OH<br>0.5 CH <sub>3</sub> OH |                         |                         |
|             | Space group                             | P2 <sub>1</sub> /n |                         |                         | P2 <sub>1</sub>                                                           |                         |                         |
|             | Temperature                             | 298 K              |                         |                         | 273 K                                                                     |                         |                         |
|             | λ [Å]                                   | 1.5418             |                         |                         | 0.7107                                                                    |                         |                         |
|             | Resolution [sin Θ/λ]                    | 0.61               |                         |                         | 0.59                                                                      |                         |                         |
|             | Resolution [d]                          | 0.82               |                         |                         | 0.84                                                                      |                         |                         |
| Refinement  |                                         | <i>SHELX</i>       | <i>XD<sub>IAM</sub></i> | <i>XD<sub>INV</sub></i> | <i>SHELX</i>                                                              | <i>XD<sub>IAM</sub></i> | <i>XD<sub>INV</sub></i> |
|             | weighting a                             | 0.0394             | 0.0394                  | 0.001                   | 0.0417                                                                    | 0.0417                  | 0.03                    |
|             | weighting b                             | 1.1263             | 1.1263                  | 0.40                    | 0.00                                                                      | 0.00                    | 0.00                    |
|             | R(F)                                    | 0.0517             | 0.0537                  | 0.0478                  | 0.0472                                                                    | 0.0389                  | 0.0375                  |
|             | R <sub>all</sub> (F)                    | 0.0615             | 0.0617                  | 0.0562                  | 0.0815                                                                    | 0.0868                  | 0.0872                  |
|             | GoFw                                    | 1.045              | 1.0954                  | 1.3203                  | 0.863                                                                     | 0.9117                  | 1.0154                  |
|             | Δρ <sub>min</sub>   + Δρ <sub>max</sub> | 0.50               | 0.54                    | 0.48                    | 0.47                                                                      | 0.45                    | 0.44                    |

Table 6: Measurements and structure refinements of sparfloxacin 3 H<sub>2</sub>O and moxifloxacin HCl 0.5 H<sub>2</sub>O 0.5 CH<sub>3</sub>OH

|             |                                         | nadifloxacin         |                         |                         | ofloxacin    |                         |                         |
|-------------|-----------------------------------------|----------------------|-------------------------|-------------------------|--------------|-------------------------|-------------------------|
| Measurement | Solvate                                 | 0.5 H <sub>2</sub> O |                         |                         | —            |                         |                         |
|             | Space group                             | P2 <sub>1</sub> /n   |                         |                         | C2/c         |                         |                         |
|             | Temperature                             | 100 K                |                         |                         | 100 K        |                         |                         |
|             | λ [Å]                                   | 1.5418               |                         |                         | 0.5608       |                         |                         |
|             | Resolution [sin Θ/λ]                    | 0.62                 |                         |                         | 0.78         |                         |                         |
|             | Resolution [d]                          | 0.81                 |                         |                         | 0.64         |                         |                         |
| Refinement  |                                         | <i>SHELX</i>         | <i>XD<sub>IAM</sub></i> | <i>XD<sub>INV</sub></i> | <i>SHELX</i> | <i>XD<sub>IAM</sub></i> | <i>XD<sub>INV</sub></i> |
|             | weighting a                             | 0.0818               | 0.0818                  | 0.08                    | 0.0722       | 0.0722                  | —                       |
|             | weighting b                             | 2.9411               | 2.9411                  | 1.37                    | 0.0722       | 3.3730                  | —                       |
|             | R(F)                                    | 0.0572               | 0.0571                  | 0.0536                  | 0.0451       | 0.0458                  | 0.0346                  |
|             | R <sub>all</sub> (F)                    | 0.0658               | 0.0773                  | 0.0747                  | 0.0594       | 0.0810                  | 0.0701                  |
|             | GoFw                                    | 1.054                | 0.3517                  | 0.4652                  | 1.016        | 0.7823                  | 2.7286                  |
|             | Δρ <sub>min</sub>   + Δρ <sub>max</sub> | 1.32                 | 1.34                    | 1.42                    | 1.048        | 1.08                    | 0.72                    |

Table 7: Measurements and structure refinements of nadifloxacin 0.5 H<sub>2</sub>O and ofloxacin anhydrate

## Aspherical scattering factors

Invariom names of scattering factors employed in invariom refinements of twelve fluoroquinolone structures are given below together with corresponding model compounds. Fluoroquinolone structures are sorted alphabetically.

Table 8: Aspherical atomic scattering factors for ciprofloxacin 6 H<sub>2</sub>O. Invariom names and corresponding model compounds from the invariom database are listed for all atoms.

| Atom   | Invariom Name                         | Model Compound                       |
|--------|---------------------------------------|--------------------------------------|
| F(15)  | F@6c                                  | 1-fluorobenzene                      |
| O(12)  | O1.5c[1.5o@6c]                        | benzoic acid anion                   |
| O(13)  | O1.5c[1.5o@6c]                        | benzoic acid anion                   |
| O(14)  | O@6c                                  | pyran-4-one ( $\gamma$ -pyrone)      |
| O(2)   | O1h1h                                 | water                                |
| O(3)   | O1h1h                                 | water                                |
| O(4)   | O1h1h                                 | water                                |
| O(5)   | O1h1h                                 | water                                |
| O(6)   | O1h1h                                 | water                                |
| O(7)   | O1h1h                                 | water                                |
| N(1)   | 6-N#66c[#66c#6c]#6c[#6c1h]@3c         | 1-cyclopropylquinolin-4-one          |
| N(20)  | N@6c1c1c                              | <i>N,N</i> -dimethylbenzenamine      |
| N(23)  | N1c1c1h1h                             | dimethylammonium                     |
| C(16)  | 3-C#3c[#3c1h1h]#3c[#3c1h1h]@6n1h      | 1-cyclopropylpyridine-2-one          |
| C(18)  | 3-C#3c[#3c@6n1h]#3c[#3c1h1h]1h1h      | 1-cyclopropylpyridine-2-one          |
| C(17)  | 3-C#3c[#3c@6n1h]#3c[#3c1h1h]1h1h      | 1-cyclopropylpyridine-2-one          |
| C(9)   | 66-C#6n[#6c@3c]#66c[#6c#6c]#6c[#6c1h] | 1-cyclopropylquinolin-2-one          |
| C(2)   | 6-C#6n[#66c@3c]#6c[#6c1c]1h           | 1-cyclopropyl-3-methylquinolin-4-one |
| C(3)   | 6-C#6c[2o#66c]#6c[#6n1h]1c            | 3-methylquinolin-4-one               |
| C(11)  | C1.5o1.5o@6c                          | benzoic acid anion                   |
| C(4)   | 6-C2o#66c[#66c#6c]#6c[#6c1c]          | 3-methyl-chromen-4-one               |
| C(10)  | 66-C#66c[#6n#6c]#6c[2o#6c]#6c[#6c1h]  | quinolin-4-one                       |
| C(5)   | 6-C#66c[#66c#6c]#6c[#6c1f]1h          | 2-fluoronaphthalen                   |
| C(6)   | 6-C#6c[#6c1n]#6c[#66c1h]1f            | 3-fluoronaphthalen-2-amine           |
| C(7)   | 6-C#6c[#6c1f]#6c[#66c1h]1n            | 3-fluoronaphthalen-2-amine           |
| C(21)  | C1n1c1h1h                             | ethylamine                           |
| C(22)  | C1n1c1h1h                             | ethylamine                           |
| C(24)  | C1n1c1h1h                             | ethylamine                           |
| C(25)  | C1n1c1h1h                             | ethylamine                           |
| C(8)   | 6-C#66c[#6n#66c]#6c[#6c1n]1h          | 7-aminoquinolin-2-one                |
| H(231) | H1n[1c1c1h]                           | dimethylammonium                     |
| H(232) | H1n[1c1c1h]                           | dimethylammonium                     |
| H(16)  | H@3c                                  | cyclopropane                         |
| H(181) | H@3c                                  | cyclopropane                         |
| H(182) | H@3c                                  | cyclopropane                         |
| H(171) | H@3c                                  | cyclopropane                         |
| H(172) | H@3c                                  | cyclopropane                         |
| H(2)   | H@6c                                  | benzene                              |
| H(5)   | H@6c                                  | benzene                              |
| H(211) | H1c[1n1c1h]                           | ethylamine                           |
| H(212) | H1c[1n1c1h]                           | ethylamine                           |
| H(221) | H1c[1n1c1h]                           | ethylamine                           |
| H(222) | H1c[1n1c1h]                           | ethylamine                           |
| H(241) | H1c[1n1c1h]                           | ethylamine                           |
| H(242) | H1c[1n1c1h]                           | ethylamine                           |
| H(251) | H1c[1n1c1h]                           | ethylamine                           |
| H(252) | H1c[1n1c1h]                           | ethylamine                           |

| Atom  | Invariom Name | Model Compound |
|-------|---------------|----------------|
| H(8)  | H@6c          | benzene        |
| H(21) | H1o[1h]       | water          |
| H(22) | H1o[1h]       | water          |
| H(31) | H1o[1h]       | water          |
| H(32) | H1o[1h]       | water          |
| H(41) | H1o[1h]       | water          |
| H(42) | H1o[1h]       | water          |
| H(51) | H1o[1h]       | water          |
| H(52) | H1o[1h]       | water          |
| H(61) | H1o[1h]       | water          |
| H(62) | H1o[1h]       | water          |
| H(71) | H1o[1h]       | water          |
| H(72) | H1o[1h]       | water          |

Table 9: Aspherical atomic scattering factors for ciprofloxacin HCl 1.4 H<sub>2</sub>O. Invariom names and corresponding model compounds from the invariom database are listed for all atoms.

| Atom   | Invariom Name                         | Model Compound                       |
|--------|---------------------------------------|--------------------------------------|
| Cl(1)  | Cl                                    | chloride                             |
| F(15)  | F@6c                                  | 1-fluorobenzene                      |
| O(12)  | O2c                                   | formaldehyde                         |
| O(13)  | O1c1h                                 | methanol                             |
| O(14)  | O@6c                                  | pyran-4-one ( $\gamma$ -pyrone)      |
| O(2)   | O1h1h                                 | water                                |
| O(31)  | O1h1h                                 | water                                |
| N(1)   | 6-N#66c[#66c#6c]#6c[#6c1h]@3c         | 1-cyclopropylquinolin-4-one          |
| N(20)  | N@6c1c1c                              | <i>N,N</i> -dimethylbenzenamine      |
| N(23)  | N1c1c1h1h                             | dimethylammonium                     |
| C(16)  | 3-C#3c[#3c1h1h]#3c[#3c1h1h]@6n1h      | 1-cyclopropylpyridine-2-one          |
| C(18)  | 3-C#3c[#3c@6n1h]#3c[#3c1h1h]1h1h      | 1-cyclopropylpyridine-2-one          |
| C(17)  | 3-C#3c[#3c@6n1h]#3c[#3c1h1h]1h1h      | 1-cyclopropylpyridine-2-one          |
| C(9)   | 66-C#6n[#6c@3c]#66c[#6c#6c]#6c[#6c1h] | 1-cyclopropylquinolin-2-one          |
| C(2)   | 6-C#6n[#66c@3c]#6c[#6c1c]1h           | 1-cyclopropyl-3-methylquinolin-4-one |
| C(3)   | 6-C#6c[2o#66c]#6c[#6n1h]1c            | 3-methylquinolin-4-one               |
| C(11)  | C2o1o@6c                              | benzoic acid                         |
| C(4)   | 6-C2o#66c[#66c#6c]#6c[#6c1c]          | 3-methyl-chromen-4-one               |
| C(10)  | 66-C#66c[#6n#6c]#6c[2o#6c]#6c[#6c1h]  | quinolin-4-one                       |
| C(5)   | 6-C#66c[#66c#6c]#6c[#6c1f]1h          | 2-fluoronaphthalen                   |
| C(6)   | 6-C#6c[#6c1n]#6c[#66c1h]1f            | 3-fluoronaphthalen-2-amine           |
| C(7)   | 6-C#6c[#6c1f]#6c[#66c1h]1n            | 3-fluoronaphthalen-2-amine           |
| C(21)  | C1n1c1h1h                             | ethylamine                           |
| C(22)  | C1n1c1h1h                             | ethylamine                           |
| C(24)  | C1n1c1h1h                             | ethylamine                           |
| C(25)  | C1n1c1h1h                             | ethylamine                           |
| C(8)   | 6-C#66c[#6n#66c]#6c[#6c1n]1h          | 7-aminoquinolin-2-one                |
| H(13)  | H1o[1c]                               | methanol                             |
| H(231) | H1n[1c1c1h]                           | dimethylammonium                     |

| Atom   | Invariom Name | Model Compound   |
|--------|---------------|------------------|
| H(232) | H1n[1c1c1h]   | dimethylammonium |
| H(16)  | H@3c          | cyclopropane     |
| H(181) | H@3c          | cyclopropane     |
| H(182) | H@3c          | cyclopropane     |
| H(171) | H@3c          | cyclopropane     |
| H(172) | H@3c          | cyclopropane     |
| H(2)   | H@6c          | benzene          |
| H(5)   | H@6c          | benzene          |
| H(211) | H1c[1n1c1h]   | ethylamine       |
| H(212) | H1c[1n1c1h]   | ethylamine       |
| H(221) | H1c[1n1c1h]   | ethylamine       |
| H(222) | H1c[1n1c1h]   | ethylamine       |
| H(241) | H1c[1n1c1h]   | ethylamine       |
| H(242) | H1c[1n1c1h]   | ethylamine       |
| H(251) | H1c[1n1c1h]   | ethylamine       |
| H(252) | H1c[1n1c1h]   | ethylamine       |
| H(8)   | H@6c          | benzene          |
| H(21)  | H1o[1h]       | water            |
| H(22)  | H1o[1h]       | water            |
| H(31)  | H1o[1h]       | water            |
| H(32)  | H1o[1h]       | water            |

Table 10: Aspherical atomic scattering factors for enoxacin 1.72 H<sub>2</sub>O. Invariom names and corresponding model compounds from the invariom database are listed for all atoms.

| Atom  | Invariom Name                | Model Compound                  |
|-------|------------------------------|---------------------------------|
| F(15) | F@6c                         | 1-fluorobenzene                 |
| F(65) | F@6c                         | 1-fluorobenzene                 |
| O(12) | O1.5c[1.5o@6c]               | benzoic acid anion              |
| O(13) | O1.5c[1.5o@6c]               | benzoic acid anion              |
| O(14) | O@6c                         | pyran-4-one ( $\gamma$ -pyrone) |
| O(62) | O1.5c[1.5o@6c]               | benzoic acid anion              |
| O(63) | O1.5c[1.5o@6c]               | benzoic acid anion              |
| O(64) | O@6c                         | pyran-4-one ( $\gamma$ -pyrone) |
| O(1)  | O1h1h                        | water                           |
| O(2)  | O1h1h                        | water                           |
| O(3)  | O1h1h                        | water                           |
| O(4)  | O1h1h                        | water                           |
| O(5)  | O1h1h                        | water                           |
| N(1)  | 6-N#66c[#6n#66c]#6c[#6c1h]1c | 1-methyl-1,8-naphthyridin-4-one |
| N(8)  | 6-N#66c[#6n#66c]#6c[#6c1n]   | 1,8-naphthyridin-2-amine        |
| N(20) | N@6c1c1c                     | <i>N,N</i> -dimethylbenzenamine |
| N(23) | N1c1c1h1h                    | dimethylammonium                |
| N(51) | 6-N#66c[#6n#66c]#6c[#6c1h]1c | 1-methyl-1,8-naphthyridin-4-one |
| N(58) | 6-N#66c[#6n#66c]#6c[#6c1n]   | 1,8-naphthyridin-2-amine        |
| N(70) | N@6c1c1c                     | <i>N,N</i> -dimethylbenzenamine |
| N(73) | N1c1c1h1h                    | dimethylammonium                |
| C(2)  | 6-C#6n[#66c1c]#6c[#6c1c]1h   | 1,3-dimethylquinolin-4-one      |

| Atom   | Invariom Name                        | Model Compound                  |
|--------|--------------------------------------|---------------------------------|
| C(3)   | 6-C#6c[2o#66c]#6c[#6n1h]1c           | 3-methylquinolin-4-one          |
| C(4)   | 6-C2o#66c[#66c#6c]#6c[#6c1c]         | 3-methyl-chromen-4-one          |
| C(5)   | 6-C#66c[#66c#6c]#6c[#6c1f]1h         | 2-fluoronaphthalen              |
| C(6)   | 6-C#6c[#6n1n]#6c[#66c1h]1f           | 3-fluoroquinolin-2-amine        |
| C(7)   | 6-C#6n[#66c]#6c[#6c1f]1n             | 3-fluoroquinolin-2-amine        |
| C(9)   | 66-C#6n[#6c1c]#6n[#6c]#66c[#6c#6c]   | 1-methyl-1,8-naphthyridin-4-one |
| C(10)  | 66-C#66c[#6n#6n]#6c[2o#6c]#6c[#6c1h] | 1,8-naphthyridin-4-one          |
| C(11)  | C1.5o1.5o@6c                         | benzoic acid anion              |
| C(16)  | C@6n1c1h1h                           | 1-ethylpylpyridine-2-one        |
| C(17)  | C1c1h1h1h                            | ethane                          |
| C(21)  | C1n1c1h1h                            | ethylamine                      |
| C(22)  | C1n1c1h1h                            | ethylamine                      |
| C(24)  | C1n1c1h1h                            | ethylamine                      |
| C(25)  | C1n1c1h1h                            | ethylamine                      |
| C(52)  | 6-C#6n[#66c1c]#6c[#6c1c]1h           | 1,3-dimethylquinolin-4-one      |
| C(53)  | 6-C#6c[2o#66c]#6c[#6n1h]1c           | 3-methylquinolin-4-one          |
| C(54)  | 6-C2o#66c[#66c#6c]#6c[#6c1c]         | 3-methyl-chromen-4-one          |
| C(55)  | 6-C#66c[#66c#6c]#6c[#6c1f]1h         | 2-fluoronaphthalen              |
| C(56)  | 6-C#6c[#6n1n]#6c[#66c1h]1f           | 3-fluoroquinolin-2-amine        |
| C(57)  | 6-C#6n[#66c]#6c[#6c1f]1n             | 3-fluoroquinolin-2-amine        |
| C(59)  | 66-C#6n[#6c1c]#6n[#6c]#66c[#6c#6c]   | 1-methyl-1,8-naphthyridin-4-one |
| C(60)  | 66-C#66c[#6n#6n]#6c[2o#6c]#6c[#6c1h] | 1,8-naphthyridin-4-one          |
| C(61)  | C1.5o1.5o@6c                         | benzoic acid anion              |
| C(66)  | C@6n1c1h1h                           | 1-ethylpylpyridine-2-one        |
| C(67)  | C1c1h1h1h                            | ethane                          |
| C(71)  | C1n1c1h1h                            | ethylamine                      |
| C(72)  | C1n1c1h1h                            | ethylamine                      |
| C(74)  | C1n1c1h1h                            | ethylamine                      |
| C(75)  | C1n1c1h1h                            | ethylamine                      |
| H(2)   | H@6c                                 | benzene                         |
| H(5)   | H@6c                                 | benzene                         |
| H(161) | H1c[@6n1c1h]                         | 1-ethylpylpyridine-2-one        |
| H(612) | H1c[@6n1c1h]                         | 1-ethylpylpyridine-2-one        |
| H(171) | H1c[1c1h1h]                          | ethane                          |
| H(172) | H1c[1c1h1h]                          | ethane                          |
| H(173) | H1c[1c1h1h]                          | ethane                          |
| H(221) | H1c[1n1c1h]                          | ethylamine                      |
| H(222) | H1c[1n1c1h]                          | ethylamine                      |
| H(232) | H1n[1c1c1h]                          | dimethylammonium                |
| H(231) | H1n[1c1c1h]                          | dimethylammonium                |
| H(241) | H1c[1n1c1h]                          | ethylamine                      |
| H(242) | H1c[1n1c1h]                          | ethylamine                      |
| H(251) | H1c[1n1c1h]                          | ethylamine                      |
| H(252) | H1c[1n1c1h]                          | ethylamine                      |
| H(211) | H1c[1n1c1h]                          | ethylamine                      |
| H(212) | H1c[1n1c1h]                          | ethylamine                      |
| H(52)  | H@6c                                 | benzene                         |
| H(55)  | H@6c                                 | benzene                         |
| H(661) | H1c[@6n1c1h]                         | 1-ethylpylpyridine-2-one        |
| H(662) | H1c[@6n1c1h]                         | 1-ethylpylpyridine-2-one        |
| H(671) | H1c[1c1h1h]                          | ethane                          |



| Atom   | Invariom Name | Model Compound   |
|--------|---------------|------------------|
| H(672) | H1c[1c1h1h]   | ethane           |
| H(673) | H1c[1c1h1h]   | ethane           |
| H(711) | H1c[1n1c1h]   | ethylamine       |
| H(712) | H1c[1n1c1h]   | ethylamine       |
| H(721) | H1c[1n1c1h]   | ethylamine       |
| H(722) | H1c[1n1c1h]   | ethylamine       |
| H(731) | H1n[1c1c1h]   | dimethylammonium |
| H(732) | H1n[1c1c1h]   | dimethylammonium |
| H(741) | H1c[1n1c1h]   | ethylamine       |
| H(742) | H1c[1n1c1h]   | ethylamine       |
| H(751) | H1c[1n1c1h]   | ethylamine       |
| H(752) | H1c[1n1c1h]   | ethylamine       |
| H(11)  | H1o[1h]       | water            |
| H(12)  | H1o[1h]       | water            |
| H(21)  | H1o[1h]       | water            |
| H(22)  | H1o[1h]       | water            |
| H(31)  | H1o[1h]       | water            |
| H(32)  | H1o[1h]       | water            |
| H(41)  | H1o[1h]       | water            |
| H(42)  | H1o[1h]       | water            |
| H(51)  | H1o[1h]       | water            |
| H(53)  | H1o[1h]       | water            |

Table 11: Aspherical atomic scattering factors for enoxacin 3 H<sub>2</sub>O. Invariom names and corresponding model compounds from the invariom database are listed for all atoms.

| Atom  | Invariom Name                        | Model Compound                  |
|-------|--------------------------------------|---------------------------------|
| F(15) | F@6c                                 | 1-fluorobenzene                 |
| O(14) | O@6c                                 | pyran-4-one ( $\gamma$ -pyrone) |
| O(12) | O1.5c[1.5o@6c]                       | benzoic acid anion              |
| O(13) | O1.5c[1.5o@6c]                       | benzoic acid anion              |
| O(4)  | O1h1h                                | water                           |
| O(5)  | O1h1h                                | water                           |
| O(6)  | O1h1h                                | water                           |
| N(1)  | 6-N#66c[#6n#66c]#6c[#6c1h]1c         | 1-methyl-1,8-naphthyridin-4-one |
| N(8)  | 6-N#66c[#6n#66c]#6c[#6c1n]           | 1,8-naphthyridin-2-amine        |
| N(20) | N@6c1c1c                             | <i>N,N</i> -dimethylbenzenamine |
| N(23) | N1c1c1h1h                            | dimethylammonium                |
| C(2)  | 6-C#6n[#66c1c]#6c[#6c1c]1h           | 1,3-dimethylquinolin-4-one      |
| C(3)  | 6-C#6c[2o#66c]#6c[#6n1h]1c           | 3-methylquinolin-4-one          |
| C(4)  | 6-C2o#66c[#66c#6c]#6c[#6c1c]         | 3-methyl-chromen-4-one          |
| C(10) | 66-C#66c[#6n#6n]#6c[2o#6c]#6c[#6c1h] | 1,8-naphthyridin-4-one          |
| C(5)  | 6-C#66c[#66c#6c]#6c[#6c1f]1h         | 2-fluoronaphthalen              |
| C(6)  | 6-C#6c[#6n1n]#6c[#66c1h]1f           | 3-fluoroquinolin-2-amine        |
| C(7)  | 6-C#6n[#66c]#6c[#6c1f]1n             | 3-fluoroquinolin-2-amine        |
| C(9)  | 66-C#6n[#6c1c]#6n[#6c]#66c[#6c#6c]   | 1-methyl-1,8-naphthyridin-4-one |
| C(16) | C@6n1c1h1h                           | 1-ethylpylpyridine-2-one        |
| C(17) | C1c1h1h1h                            | ethane                          |

| Atom   | Invariom Name | Model Compound        |
|--------|---------------|-----------------------|
| C(11)  | C1.5o1.5o@6c  | benzoic acid anion    |
| C(25)  | C1n1c1h1h     | ethylamine            |
| C(24)  | C1n1c1h1h     | ethylamine            |
| C(22)  | C1n1c1h1h     | ethylamine            |
| C(21)  | C1n1c1h1h     | ethylamine            |
| H(23A) | H1n[1c1c1h]   | dimethylammonium      |
| H(23B) | H1n[1c1c1h]   | dimethylammonium      |
| H(2)   | H@6c          | benzene               |
| H(5)   | H@6c          | benzene               |
| H(16A) | H1c[@6n1c1h]  | 1-ethylpyridine-2-one |
| H(16B) | H1c[@6n1c1h]  | 1-ethylpyridine-2-one |
| H(17A) | H1c[1c1h1h]   | ethane                |
| H(17B) | H1c[1c1h1h]   | ethane                |
| H(17C) | H1c[1c1h1h]   | ethane                |
| H(25A) | H1c[1n1c1h]   | ethylamine            |
| H(25B) | H1c[1n1c1h]   | ethylamine            |
| H(24A) | H1c[1n1c1h]   | ethylamine            |
| H(24B) | H1c[1n1c1h]   | ethylamine            |
| H(22A) | H1c[1n1c1h]   | ethylamine            |
| H(22B) | H1c[1n1c1h]   | ethylamine            |
| H(21A) | H1c[1n1c1h]   | ethylamine            |
| H(21B) | H1c[1n1c1h]   | ethylamine            |
| H(041) | H1o[1h]       | water                 |
| H(042) | H1o[1h]       | water                 |
| H(051) | H1o[1h]       | water                 |
| H(052) | H1o[1h]       | water                 |
| H(061) | H1o[1h]       | water                 |
| H(062) | H1o[1h]       | water                 |

Table 12: Aspherical atomic scattering factors for fleroxacin H<sub>2</sub>O HCl. Invariom names and corresponding model compounds from the invariom database are listed for all atoms.

| Atom  | Invariom Name                        | Model Compound                  |
|-------|--------------------------------------|---------------------------------|
| Cl(1) | Cl                                   | chloride                        |
| F(15) | F@6c                                 | 1-fluorobenzene                 |
| F(8)  | F@6c                                 | 1-fluorobenzene                 |
| F(17) | F1c                                  | fluoromethane                   |
| O(13) | O1c1h                                | methanol                        |
| O(12) | O2c                                  | formaldehyde                    |
| O(14) | O@6c                                 | pyran-4-one ( $\gamma$ -pyrone) |
| O(2)  | O1h1h                                | water                           |
| N(1)  | 6-N#66c[#66c#6c]#6c[#6c1h]1c         | 1,3-dimethylquinolin-4-one      |
| N(20) | N@6c1c1c                             | <i>N,N</i> -dimethylbenzenamine |
| N(23) | N1c1c1c1h                            | trimethylammonium               |
| C(11) | C2o1o@6c                             | benzoic acid                    |
| C(3)  | 6-C#6c[2o#66c]#6c[#6n1h]1c           | 3-methylquinolin-4-one          |
| C(4)  | 6-C2o#66c[#66c#6c]#6c[#6c1c]         | 3-methyl-chromen-4-one          |
| C(10) | 66-C#66c[#6n#6c]#6c[2o#6c]#6c[#6c1h] | quinolin-4-one                  |
| C(9)  | 66-C#6n[#6c1c]#66c[#6c#6c]#6c[#6c1f] | 8-fluoro-1-methylquinolin-2-one |

| Atom   | Invariom Name                | Model Compound                 |
|--------|------------------------------|--------------------------------|
| C(2)   | 6-C#6n[#66c1c]#6c[#6c1c]1h   | 1,3-dimethylquinolin-4-one     |
| C(16)  | C@6n1c1h1h                   | 1-ethylpylpyridine-2-one       |
| C(17)  | C1f1c1h1h                    | fluoroethane                   |
| C(8)   | 6-C#66c[#6n#66c]#6c[#6c1n]1f | 7-amino-8-fluoroquinolin-2-one |
| C(7)   | 6-C#6c[#66c1f]#6c[#6c1f]1n   | 1,3-difluoronaphthalen-2-amine |
| C(6)   | 6-C#6c[#6c1n]#6c[#66c1h]1f   | 3-fluoronaphthalen-2-amine     |
| C(5)   | 6-C#66c[#66c#6c]#6c[#6c1f]1h | 2-fluoronaphthalen             |
| C(25)  | C1n1c1h1h                    | ethylamine                     |
| C(24)  | C1n1c1h1h                    | ethylamine                     |
| C(19)  | C1n1c1h1h                    | ethylamine                     |
| C(21)  | C1n1c1h1h                    | ethylamine                     |
| C(26)  | C1n1h1h1h                    | methylamine                    |
| H(13)  | H1o[1c]                      | methanol                       |
| H(23)  | H1n[1c1c1c]                  | trimethylammonium              |
| H(2)   | H@6c                         | benzene                        |
| H(161) | H1c[@6n1c1h]                 | 1-ethylpylpyridine-2-one       |
| H(162) | H1c[@6n1c1h]                 | 1-ethylpylpyridine-2-one       |
| H(171) | H1c[1f1c1h]                  | fluoroethane                   |
| H(172) | H1c[1f1c1h]                  | fluoroethane                   |
| H(5)   | H@6c                         | benzene                        |
| H(251) | H1c[1n1c1h]                  | ethylamine                     |
| H(252) | H1c[1n1c1h]                  | ethylamine                     |
| H(241) | H1c[1n1c1h]                  | ethylamine                     |
| H(242) | H1c[1n1c1h]                  | ethylamine                     |
| H(191) | H1c[1n1c1h]                  | ethylamine                     |
| H(192) | H1c[1n1c1h]                  | ethylamine                     |
| H(211) | H1c[1n1c1h]                  | ethylamine                     |
| H(212) | H1c[1n1c1h]                  | ethylamine                     |
| H(261) | H1c[1n1h1h]                  | methylamine                    |
| H(262) | H1c[1n1h1h]                  | methylamine                    |
| H(263) | H1c[1n1h1h]                  | methylamine                    |
| H(21)  | H1o[1h]                      | water                          |
| H(22)  | H1o[1h]                      | water                          |

Table 13: Aspherical atomic scattering factors for lomefloxacin 4 H<sub>2</sub>O HCl. Invariom names and corresponding model compounds from the invariom database are listed for all atoms.

| Atom   | Invariom Name                | Model Compound                  |
|--------|------------------------------|---------------------------------|
| Cl(1)  | Cl                           | chloride                        |
| F(17)  | F@6c                         | 1-fluorobenzene                 |
| F(18)  | F@6c                         | 1-fluorobenzene                 |
| O(1)   | O1h1h                        | water                           |
| O(2)   | O1h1h                        | water                           |
| O(12)  | O2c                          | formaldehyde                    |
| O(13)  | O1c1h                        | methanol                        |
| O(14)  | O@6c                         | pyran-4-one ( $\gamma$ -pyrone) |
| N(1)   | 6-N#66c[#66c#6c]#6c[#6c1h]1c | 1,3-dimethylquinolin-4-one      |
| N(20)  | N@6c1c1c                     | <i>N,N</i> -dimethylbenzenamine |
| N(23A) | N1c1c1h1h                    | dimethylammonium                |

| Atom   | Invariom Name                        | Model Compound                  |
|--------|--------------------------------------|---------------------------------|
| N(23B) | N1c1c1h1h                            | dimethylammonium                |
| C(2)   | 6-C#6n[#66c1c]#6c[#6c1c]1h           | 1,3-dimethylquinolin-4-one      |
| C(3)   | 6-C#6c[2o#66c]#6c[#6n1h]1c           | 3-methylquinolin-4-one          |
| C(5)   | 6-C#66c[#66c#6c]#6c[#6c1f]1h         | 2-fluoronaphthalen              |
| C(4)   | 6-C2o#66c[#66c#6c]#6c[#6c1c]         | 3-methyl-chromen-4-one          |
| C(6)   | 6-C#6c[#6c1n]#6c[#66c1h]1f           | 3-fluoronaphthalen-2-amine      |
| C(7)   | 6-C#6c[#66c1f]#6c[#6c1f]1n           | 1,3-difluoronaphthalen-2-amine  |
| C(9)   | 66-C#6n[#6c1c]#66c[#6c#6c]#6c[#6c1f] | 8-fluoro-1-methylquinolin-2-one |
| C(8)   | 6-C#66c[#6n#66c]#6c[#6c1n]1f         | 7-amino-8-fluoroquinolin-2-one  |
| C(10)  | 66-C#66c[#6n#6c]#6c[2o#6c]#6c[#6c1h] | quinolin-4-one                  |
| C(11)  | C2o1o@6c                             | benzoic acid                    |
| C(15)  | C@6n1c1h1h                           | 1-ethylpyridine-2-one           |
| C(16)  | C1c1h1h1h                            | ethane                          |
| C(21A) | C1n1c1h1h                            | ethylamine                      |
| C(22A) | C1n1c1c1h                            | 2-aminopropane                  |
| C(24A) | C1n1c1h1h                            | ethylamine                      |
| C(25A) | C1n1c1h1h                            | ethylamine                      |
| C(26A) | C1c1h1h1h                            | ethane                          |
| C(21B) | C1n1c1h1h                            | ethylamine                      |
| C(22B) | C1n1c1c1h                            | 2-aminopropane                  |
| C(24B) | C1n1c1h1h                            | ethylamine                      |
| C(25B) | C1n1c1h1h                            | ethylamine                      |
| C(26B) | C1c1h1h1h                            | ethane                          |
| H(1A)  | H1o[1h]                              | water                           |
| H(1B)  | H1o[1h]                              | water                           |
| H(2A)  | H1o[1h]                              | water                           |
| H(2B)  | H1o[1h]                              | water                           |
| H(2)   | H@6c                                 | benzene                         |
| H(5)   | H@6c                                 | benzene                         |
| H(13)  | H1o[1c]                              | methanol                        |
| H(15A) | H1c[@6n1c1h]                         | 1-ethylpyridine-2-one           |
| H(15B) | H1c[@6n1c1h]                         | 1-ethylpyridine-2-one           |
| H(16A) | H1c[1c1h1h]                          | ethane                          |
| H(16B) | H1c[1c1h1h]                          | ethane                          |
| H(16C) | H1c[1c1h1h]                          | ethane                          |
| H(23A) | H1n[1c1c1h]                          | dimethylammonium                |
| H(23B) | H1n[1c1c1h]                          | dimethylammonium                |
| H(21A) | H1c[1n1c1h]                          | ethylamine                      |
| H(21B) | H1c[1n1c1h]                          | ethylamine                      |
| H(22A) | H1c[1n1c1c]                          | 2-aminopropane                  |
| H(24C) | H1c[1n1c1h]                          | ethylamine                      |
| H(24D) | H1c[1n1c1h]                          | ethylamine                      |
| H(25A) | H1c[1n1c1h]                          | ethylamine                      |
| H(25C) | H1c[1n1c1h]                          | ethylamine                      |
| H(26A) | H1c[1c1h1h]                          | ethane                          |
| H(26B) | H1c[1c1h1h]                          | ethane                          |
| H(26C) | H1c[1c1h1h]                          | ethane                          |
| H(23C) | H1n[1c1c1h]                          | dimethylammonium                |
| H(23D) | H1n[1c1c1h]                          | dimethylammonium                |
| H(21C) | H1c[1n1c1h]                          | ethylamine                      |
| H(21D) | H1c[1n1c1h]                          | ethylamine                      |

| Atom   | Invariom Name | Model Compound |
|--------|---------------|----------------|
| H(22B) | H1c[1n1c1c]   | 2-aminopropane |
| H(24E) | H1c[1n1c1h]   | ethylamine     |
| H(24F) | H1c[1n1c1h]   | ethylamine     |
| H(25D) | H1c[1n1c1h]   | ethylamine     |
| H(25E) | H1c[1n1c1h]   | ethylamine     |
| H(26D) | H1c[1c1h1h]   | ethane         |
| H(26E) | H1c[1c1h1h]   | ethane         |
| H(26F) | H1c[1c1h1h]   | ethane         |

Table 14: Aspherical atomic scattering factors for moxifloxacin HCl 0.5 H<sub>2</sub>O  
 0.5 CH<sub>3</sub>OH. Invariom names and corresponding model compounds from the  
 invariom database are listed for all atoms.

| Atom   | Invariom Name                         | Model Compound                                         |
|--------|---------------------------------------|--------------------------------------------------------|
| Cl-(1) | Cl                                    | chloride                                               |
| Cl-(2) | Cl                                    | chloride                                               |
| F(15)  | F@6c                                  | 1-fluorobenzene                                        |
| F(65)  | F@6c                                  | 1-fluorobenzene                                        |
| O(12)  | O1c1h                                 | methanol                                               |
| O(13)  | O2c                                   | formaldehyde                                           |
| O(14)  | O@6c                                  | pyran-4-one ( $\gamma$ -pyrone)                        |
| O(19)  | O@6c1c                                | anisole                                                |
| O(63)  | O1c1h                                 | methanol                                               |
| O(62)  | O2c                                   | formaldehyde                                           |
| O(64)  | O@6c                                  | pyran-4-one ( $\gamma$ -pyrone)                        |
| O(69)  | O@6c1c                                | anisole                                                |
| O(4)   | O1c1h                                 | methanol                                               |
| O(42)  | O1h1h                                 | water                                                  |
| N(1)   | 6-N#66c[#66c#6c]#6c[#6c1h]@3c         | 1-cyclopropylquinolin-4-one                            |
| N(20)  | N@6c1c1c                              | <i>N,N</i> -dimethylbenzenamine                        |
| N(23)  | N1c1c1h1h                             | dimethylammonium                                       |
| N(51)  | 6-N#66c[#66c#6c]#6c[#6c1h]@3c         | 1-cyclopropylquinolin-4-one                            |
| N(70)  | N@6c1c1c                              | <i>N,N</i> -dimethylbenzenamine                        |
| N(73)  | N1c1c1h1h                             | dimethylammonium                                       |
| C(2)   | 6-C#6n[#66c@3c]#6c[#6c1c]1h           | 1-cyclopropyl-3-methylquinolin-4-one                   |
| C(3)   | 6-C#6c[2o#66c]#6c[#6n1h]1c            | 3-methylquinolin-4-one                                 |
| C(4)   | 6-C2o#66c[#66c#6c]#6c[#6c1c]          | 3-methyl-chromen-4-one                                 |
| C(10)  | 66-C#66c[#6n#6c]#6c[2o#6c]#6c[#6c1h]  | quinolin-4-one                                         |
| C(5)   | 6-C#66c[#66c#6c]#6c[#6c1f]1h          | 2-fluoronaphthalen                                     |
| C(6)   | 6-C#6c[#6c1n]#6c[#66c1h]1f            | 3-fluoronaphthalen-2-amine                             |
| C(7)   | 6-C#6c[#6c1f]#6c[#66c1o]1n            | 2-amino-3-fluoronaphthalen-1-ol                        |
| C(8)   | 6-C#66c[#6n#66c]#6c[#6c1n]1o          | 7-amino-8-hydroxyquinolin-2-one                        |
| C(9)   | 66-C#6n[#6c@3c]#66c[#6c#6c]#6c[#6c1o] | 1-cyclopropyl-8-hydroxy-1,8a-dihydroquinolin-2(3H)-one |
| C(11)  | C2o1o@6c                              | benzoic acid                                           |
| C(16)  | 3-C#3c[#3c1h1h]#3c[#3c1h1h]@6n1h      | 1-cyclopropylpyridine-2-one                            |
| C(17)  | 3-C#3c[#3c@6n1h]#3c[#3c1h1h]1h1h      | 1-cyclopropylpyridine-2-one                            |
| C(18)  | 3-C#3c[#3c@6n1h]#3c[#3c1h1h]1h1h      | 1-cyclopropylpyridine-2-one                            |
| C(19)  | C1o1h1h1h                             | methanol                                               |

| Atom   | Invariom Name                         | Model Compound                                         |
|--------|---------------------------------------|--------------------------------------------------------|
| C(21)  | C1n1c1h1h                             | ethylamine                                             |
| C(22)  | C1n1c1c1h                             | 2-aminopropane                                         |
| C(24)  | C1n1c1h1h                             | ethylamine                                             |
| C(25)  | C1c1c1h1h                             | propane                                                |
| C(26)  | C1c1c1h1h                             | propane                                                |
| C(27)  | C1c1c1c1h                             | isobutane                                              |
| C(28)  | C1n1c1h1h                             | ethylamine                                             |
| C(52)  | 6-C#6n[#66c@3c]#6c[#6c1c]1h           | 1-cyclopropyl-3-methylquinolin-4-one                   |
| C(53)  | 6-C#6c[2o#66c]#6c[#6n1h]1c            | 3-methylquinolin-4-one                                 |
| C(54)  | 6-C2o#66c[#66c#6c]#6c[#6c1c]          | 3-methyl-chromen-4-one                                 |
| C(60)  | 66-C#66c[#6n#6c]#6c[2o#6c]#6c[#6c1h]  | quinolin-4-one                                         |
| C(55)  | 6-C#66c[#66c#6c]#6c[#6c1f]1h          | 2-fluoronaphthalen                                     |
| C(56)  | 6-C#6c[#6c1n]#6c[#66c1h]1f            | 3-fluoronaphthalen-2-amine                             |
| C(57)  | 6-C#6c[#6c1f]#6c[#66c1o]1n            | 2-amino-3-fluoronaphthalen-1-ol                        |
| C(58)  | 6-C#66c[#6n#66c]#6c[#6c1n]1o          | 7-amino-8-hydroxyquinolin-2-one                        |
| C(59)  | 66-C#6n[#6c@3c]#66c[#6c#6c]#6c[#6c1o] | 1-cyclopropyl-8-hydroxy-1,8a-dihydroquinolin-2(3H)-one |
| C(61)  | C2o1o@6c                              | benzoic acid                                           |
| C(66)  | 3-C#3c[#3c1h1h]#3c[#3c1h1h]@6n1h      | 1-cyclopropylpyridine-2-one                            |
| C(67)  | 3-C#3c[#3c@6n1h]#3c[#3c1h1h]1h1h      | 1-cyclopropylpyridine-2-one                            |
| C(68)  | 3-C#3c[#3c@6n1h]#3c[#3c1h1h]1h1h      | 1-cyclopropylpyridine-2-one                            |
| C(69)  | C1o1h1h1h                             | methanol                                               |
| C(71)  | C1n1c1h1h                             | ethylamine                                             |
| C(72)  | C1n1c1c1h                             | 2-aminopropane                                         |
| C(74)  | C1n1c1h1h                             | ethylamine                                             |
| C(75)  | C1c1c1h1h                             | propane                                                |
| C(76)  | C1c1c1h1h                             | propane                                                |
| C(77)  | C1c1c1c1h                             | isobutane                                              |
| C(78)  | C1n1c1h1h                             | ethylamine                                             |
| C(41)  | C1o1h1h1h                             | methanol                                               |
| H(12)  | H1o[1c]                               | methanol                                               |
| H(23A) | H1n[1c1c1h]                           | dimethylammonium                                       |
| H(23B) | H1n[1c1c1h]                           | dimethylammonium                                       |
| H(2)   | H@6c                                  | benzene                                                |
| H(5)   | H@6c                                  | benzene                                                |
| H(16)  | H@3c                                  | cyclopropane                                           |
| H(17A) | H@3c                                  | cyclopropane                                           |
| H(17B) | H@3c                                  | cyclopropane                                           |
| H(18A) | H@3c                                  | cyclopropane                                           |
| H(18B) | H@3c                                  | cyclopropane                                           |
| H(19A) | H1c[1o1h1h]                           | methanol                                               |
| H(19B) | H1c[1o1h1h]                           | methanol                                               |
| H(19C) | H1c[1o1h1h]                           | methanol                                               |
| H(21A) | H1c[1n1c1h]                           | ethylamine                                             |
| H(21B) | H1c[1n1c1h]                           | ethylamine                                             |
| H(22A) | H1c[1n1c1c]                           | 2-aminopropane                                         |
| H(24A) | H1c[1n1c1h]                           | ethylamine                                             |
| H(24B) | H1c[1n1c1h]                           | ethylamine                                             |
| H(25A) | H1c[1c1c1h]                           | propane                                                |
| H(25B) | H1c[1c1c1h]                           | propane                                                |
| H(26A) | H1c[1c1c1h]                           | propane                                                |
| H(26B) | H1c[1c1c1h]                           | propane                                                |

| Atom   | Invariom Name | Model Compound   |
|--------|---------------|------------------|
| H(27)  | H1c[1c1c1c]   | isobutane        |
| H(28A) | H1c[1n1c1h]   | ethylamine       |
| H(28B) | H1c[1n1c1h]   | ethylamine       |
| H(63)  | H1o[1c]       | methanol         |
| H(73A) | H1n[1c1c1h]   | dimethylammonium |
| H(73B) | H1n[1c1c1h]   | dimethylammonium |
| H(52)  | H@6c          | benzene          |
| H(55)  | H@6c          | benzene          |
| H(66)  | H@3c          | cyclopropane     |
| H(67A) | H@3c          | cyclopropane     |
| H(67B) | H@3c          | cyclopropane     |
| H(68A) | H@3c          | cyclopropane     |
| H(68B) | H@3c          | cyclopropane     |
| H(69A) | H1c[1o1h1h]   | methanol         |
| H(69B) | H1c[1o1h1h]   | methanol         |
| H(69C) | H1c[1o1h1h]   | methanol         |
| H(71A) | H1c[1n1c1h]   | ethylamine       |
| H(71B) | H1c[1n1c1h]   | ethylamine       |
| H(72)  | H1c[1n1c1c]   | 2-aminopropane   |
| H(74A) | H1c[1n1c1h]   | ethylamine       |
| H(74B) | H1c[1n1c1h]   | ethylamine       |
| H(75A) | H1c[1c1c1h]   | propane          |
| H(75B) | H1c[1c1c1h]   | propane          |
| H(76A) | H1c[1c1c1h]   | propane          |
| H(76B) | H1c[1c1c1h]   | propane          |
| H(77)  | H1c[1c1c1c]   | isobutane        |
| H(78A) | H1c[1n1c1h]   | ethylamine       |
| H(78B) | H1c[1n1c1h]   | ethylamine       |
| H(04)  | H1o[1c]       | methanol         |
| H(41A) | H1c[1o1h1h]   | methanol         |
| H(41B) | H1c[1o1h1h]   | methanol         |
| H(41C) | H1c[1o1h1h]   | methanol         |
| H(42A) | H1o[1h]       | water            |
| H(42B) | H1o[1h]       | water            |

Table 15: Aspherical atomic scattering factors for nadifloxacin 0.5 H<sub>2</sub>O. Invariom names and corresponding model compounds from the invariom database are listed for all atoms.

| Atom  | Invariom Name | Model Compound                  |
|-------|---------------|---------------------------------|
| F(15) | F@6c          | 1-fluorobenzene                 |
| F(65) | F@6c          | 1-fluorobenzene                 |
| O(14) | O@6c          | pyran-4-one ( $\gamma$ -pyrone) |
| O(13) | O2c           | formaldehyde                    |
| O(12) | O1c1h         | methanol                        |
| O(23) | O1c1h         | methanol                        |
| O(63) | O2c           | formaldehyde                    |
| O(62) | O1c1h         | methanol                        |
| O(73) | O1c1h         | methanol                        |
| O(64) | O@6c          | pyran-4-one ( $\gamma$ -pyrone) |

| Atom   | Invariom Name                        | Model Compound                                          |
|--------|--------------------------------------|---------------------------------------------------------|
| O(4)   | O1h1h                                | water                                                   |
| N(1)   | 6-N#66c[#66c#6c]#6c[#6c1h]1c         | 1,3-dimethylquinolin-4-one                              |
| N(20)  | N@6c1c1c                             | <i>N,N</i> -dimethylbenzenamine                         |
| N(70)  | N@6c1c1c                             | <i>N,N</i> -dimethylbenzenamine                         |
| N(51)  | 6-N#66c[#66c#6c]#6c[#6c1h]1c         | 1,3-dimethylquinolin-4-one                              |
| C(9)   | 66-C#6n[#6c1c]#66c[#6c#6c]#6c[#6c1c] | 2,3-dihydro-5-oxo-(1H,5H)-benzo[ <i>ij</i> ]quinolizine |
| C(8)   | 6-C#66c[#6n#66c]#6c[#6c1n]1c         | 8-methylquinolin-7-amine                                |
| C(3)   | 6-C#6c[2o#66c]#6c[#6n1h]1c           | 3-methylquinolin-4-one                                  |
| C(10)  | 66-C#66c[#6n#6c]#6c[2o#6c]#6c[#6c1h] | quinolin-4-one                                          |
| C(5)   | 6-C#66c[#66c#6c]#6c[#6c1f]1h         | 2-fluoronaphthalen                                      |
| C(7)   | 6-C#6c[#6c1f]#6c[#66c1c]1n           | 3-fluoro-1-methylnaphthalen-2-amine                     |
| C(4)   | 6-C2o#66c[#66c#6c]#6c[#6c1c]         | 3-methyl-chromen-4-one                                  |
| C(6)   | 6-C#6c[#6c1n]#6c[#66c1h]1f           | 3-fluoronaphthalen-2-amine                              |
| C(11)  | C2o1o@6c                             | benzoic acid                                            |
| C(16)  | C@6c1c1h1h                           | isochroman                                              |
| C(21)  | C1n1c1h1h                            | ethylamine                                              |
| C(25)  | C1n1c1h1h                            | ethylamine                                              |
| C(22)  | C1c1c1h1h                            | propane                                                 |
| C(19)  | C1c1h1h1h                            | ethane                                                  |
| C(2)   | 6-C#6n[#66c1c]#6c[#6c1c]1h           | 1,3-dimethylquinolin-4-one                              |
| C(17)  | C1c1c1h1h                            | propane                                                 |
| C(18)  | C@6n1c1c1h                           | 1-isopropylpyridin-2-one                                |
| C(24)  | C1c1c1h1h                            | propane                                                 |
| C(23)  | C1o1c1c1h                            | 2-propanol                                              |
| C(59)  | 66-C#6n[#6c1c]#66c[#6c#6c]#6c[#6c1c] | 2,3-dihydro-5-oxo-(1H,5H)-benzo[ <i>ij</i> ]quinolizine |
| C(54)  | 6-C2o#66c[#66c#6c]#6c[#6c1c]         | 3-methyl-chromen-4-one                                  |
| C(57)  | 6-C#6c[#6c1f]#6c[#66c1c]1n           | 3-fluoro-1-methylnaphthalen-2-amine                     |
| C(55)  | 6-C#66c[#66c#6c]#6c[#6c1f]1h         | 2-fluoronaphthalen                                      |
| C(53)  | 6-C#6c[2o#66c]#6c[#6n1h]1c           | 3-methylquinolin-4-one                                  |
| C(56)  | 6-C#6c[#6c1n]#6c[#66c1h]1f           | 3-fluoronaphthalen-2-amine                              |
| C(58)  | 6-C#66c[#6n#66c]#6c[#6c1n]1c         | 8-methylquinolin-7-amine                                |
| C(60)  | 66-C#66c[#6n#6c]#6c[2o#6c]#6c[#6c1h] | quinolin-4-one                                          |
| C(68)  | C@6n1c1c1h                           | 1-isopropylpyridin-2-one                                |
| C(66)  | C@6c1c1h1h                           | isochroman                                              |
| C(67)  | C1c1c1h1h                            | propane                                                 |
| C(52)  | 6-C#6n[#66c1c]#6c[#6c1c]1h           | 1,3-dimethylquinolin-4-one                              |
| C(71)  | C1n1c1h1h                            | ethylamine                                              |
| C(61)  | C2o1o@6c                             | benzoic acid                                            |
| C(74)  | C1c1c1h1h                            | propane                                                 |
| C(75)  | C1n1c1h1h                            | ethylamine                                              |
| C(72)  | C1c1c1h1h                            | propane                                                 |
| C(69)  | C1c1h1h1h                            | ethane                                                  |
| C(73)  | C1o1c1c1h                            | 2-propanol                                              |
| H(12)  | H1o[1c]                              | methanol                                                |
| H(23)  | H1o[1c]                              | methanol                                                |
| H(5)   | H@6c                                 | benzene                                                 |
| H(161) | H1c[@6c1c1h]                         | isochroman                                              |
| H(162) | H1c[@6c1c1h]                         | isochroman                                              |
| H(211) | H1c[1n1c1h]                          | ethylamine                                              |
| H(212) | H1c[1n1c1h]                          | ethylamine                                              |
| H(251) | H1c[1n1c1h]                          | ethylamine                                              |



| Atom   | Invariom Name | Model Compound           |
|--------|---------------|--------------------------|
| H(252) | H1c[1n1c1h]   | ethylamine               |
| H(221) | H1c[1c1c1h]   | propane                  |
| H(222) | H1c[1c1c1h]   | propane                  |
| H(191) | H1c[1c1h1h]   | ethane                   |
| H(192) | H1c[1c1h1h]   | ethane                   |
| H(193) | H1c[1c1h1h]   | ethane                   |
| H(2)   | H@6c          | benzene                  |
| H(171) | H1c[1c1c1h]   | propane                  |
| H(172) | H1c[1c1c1h]   | propane                  |
| H(18)  | H1c[@6n1c1c]  | 1-isopropylpyridin-2-one |
| H(241) | H1c[1c1c1h]   | propane                  |
| H(242) | H1c[1c1c1h]   | propane                  |
| H(231) | H1c[1o1c1c]   | 2-propanol               |
| H(62)  | H1o[1c]       | methanol                 |
| H(73)  | H1o[1c]       | methanol                 |
| H(55)  | H@6c          | benzene                  |
| H(68)  | H1c[@6n1c1c]  | 1-isopropylpyridin-2-one |
| H(661) | H1c[@6c1c1h]  | isochroman               |
| H(662) | H1c[@6c1c1h]  | isochroman               |
| H(671) | H1c[1c1c1h]   | propane                  |
| H(672) | H1c[1c1c1h]   | propane                  |
| H(52)  | H@6c          | benzene                  |
| H(711) | H1c[1n1c1h]   | ethylamine               |
| H(712) | H1c[1n1c1h]   | ethylamine               |
| H(741) | H1c[1c1c1h]   | propane                  |
| H(742) | H1c[1c1c1h]   | propane                  |
| H(751) | H1c[1n1c1h]   | ethylamine               |
| H(752) | H1c[1n1c1h]   | ethylamine               |
| H(721) | H1c[1c1c1h]   | propane                  |
| H(722) | H1c[1c1c1h]   | propane                  |
| H(691) | H1c[1c1h1h]   | ethane                   |
| H(692) | H1c[1c1h1h]   | ethane                   |
| H(693) | H1c[1c1h1h]   | ethane                   |
| H(731) | H1c[1o1c1c]   | 2-propanol               |
| H(41)  | H1o[1h]       | water                    |
| H(42)  | H1o[1h]       | water                    |

Table 16: Aspherical atomic scattering factors for norfloxacin anhydrate. Invariom names and corresponding model compounds from the invariom database are listed for all atoms.

| Atom  | Invariom Name                | Model Compound                  |
|-------|------------------------------|---------------------------------|
| F(15) | F@6c                         | 1-fluorobenzene                 |
| O(12) | O2c                          | formaldehyde                    |
| O(13) | O1c1h                        | methanol                        |
| O(14) | O@6c                         | pyran-4-one ( $\gamma$ -pyrone) |
| N(1)  | 6-N#66c[#66c#6c]#6c[#6c1h]1c | 1,3-dimethylquinolin-4-one      |
| N(20) | N@6c1c1c                     | <i>N,N</i> -dimethylbenzenamine |
| N(23) | N1c1c1h                      | dimethylamine                   |
| C(2)  | 6-C#6n[#66c1c]#6c[#6c1c]1h   | 1,3-dimethylquinolin-4-one      |
| C(3)  | 6-C#6c[2o#66c]#6c[#6n1h]1c   | 3-methylquinolin-4-one          |

| Atom   | Invariom Name                        | Model Compound             |
|--------|--------------------------------------|----------------------------|
| C(11)  | C2o1o@6c                             | benzoic acid               |
| C(4)   | 6-C2o#66c[#66c#6c]#6c[#6c1c]         | 3-methyl-chromen-4-one     |
| C(10)  | 66-C#66c[#6n#6c]#6c[2o#6c]#6c[#6c1h] | quinolin-4-one             |
| C(5)   | 6-C#66c[#66c#6c]#6c[#6c1f]1h         | 2-fluoronaphthalen         |
| C(6)   | 6-C#6c[#6c1n]#6c[#66c1h]1f           | 3-fluoronaphthalen-2-amine |
| C(7)   | 6-C#6c[#6c1f]#6c[#66c1h]1n           | 3-fluoronaphthalen-2-amine |
| C(8)   | 6-C#66c[#6n#66c]#6c[#6c1n]1h         | 7-aminoquinolin-2-one      |
| C(9)   | 66-C#6n[#6c1c]#66c[#6c#6c]#6c[#6c1h] | 1,3-dimethylquinolin-4-one |
| C(25)  | C1n1c1h1h                            | ethylamine                 |
| C(24)  | C1n1c1h1h                            | ethylamine                 |
| C(22)  | C1n1c1h1h                            | ethylamine                 |
| C(21)  | C1n1c1h1h                            | ethylamine                 |
| C(16)  | C@6n1c1h1h                           | 1-ethylpyridine-2-one      |
| C(17)  | C1c1h1h1h                            | ethane                     |
| H(13)  | H1o[1c]                              | methanol                   |
| H(23A) | H1n[1c1c]                            | dimethylamine              |
| H(2)   | H@6c                                 | benzene                    |
| H(5)   | H@6c                                 | benzene                    |
| H(8)   | H@6c                                 | benzene                    |
| H(25A) | H1c[1n1c1h]                          | ethylamine                 |
| H(25B) | H1c[1n1c1h]                          | ethylamine                 |
| H(24A) | H1c[1n1c1h]                          | ethylamine                 |
| H(24B) | H1c[1n1c1h]                          | ethylamine                 |
| H(22A) | H1c[1n1c1h]                          | ethylamine                 |
| H(22B) | H1c[1n1c1h]                          | ethylamine                 |
| H(21A) | H1c[1n1c1h]                          | ethylamine                 |
| H(21B) | H1c[1n1c1h]                          | ethylamine                 |
| H(16A) | H1c[@6n1c1h]                         | 1-ethylpyridine-2-one      |
| H(16B) | H1c[@6n1c1h]                         | 1-ethylpyridine-2-one      |
| H(17A) | H1c[1c1h1h]                          | ethane                     |
| H(17B) | H1c[1c1h1h]                          | ethane                     |
| H(17C) | H1c[1c1h1h]                          | ethane                     |

Table 17: Aspherical atomic scattering factors for norfloxacin 2 H<sub>2</sub>O. Invariom names and corresponding model compounds from the invariom database are listed for all atoms.

| Atom  | Invariom Name                | Model Compound                  |
|-------|------------------------------|---------------------------------|
| F(15) | F@6c                         | 1-fluorobenzene                 |
| O(13) | O1.5c[1.5o@6c]               | benzoic acid anion              |
| O(12) | O1.5c[1.5o@6c]               | benzoic acid anion              |
| O(14) | O@6c                         | pyran-4-one ( $\gamma$ -pyrone) |
| O(2)  | O1h1h                        | water                           |
| O(3)  | O1h1h                        | water                           |
| N(23) | N1c1c1h1h                    | dimethylammonium                |
| N(1)  | 6-N#66c[#66c#6c]#6c[#6c1h]1c | 1,3-dimethylquinolin-4-one      |
| N(20) | N@6c1c1c                     | <i>N,N</i> -dimethylbenzenamine |
| C(6)  | 6-C#6c[#6c1n]#6c[#66c1h]1f   | 3-fluoronaphthalen-2-amine      |
| C(11) | C1.5o1.5o@6c                 | benzoic acid anion              |
| C(4)  | 6-C2o#66c[#66c#6c]#6c[#6c1c] | 3-methyl-chromen-4-one          |

| Atom   | Invariom Name                        | Model Compound             |
|--------|--------------------------------------|----------------------------|
| C(3)   | 6-C#6c[2o#66c]#6c[#6n1h]1c           | 3-methylquinolin-4-one     |
| C(10)  | 66-C#66c[#6n#6c]#6c[2o#6c]#6c[#6c1h] | quinolin-4-one             |
| C(5)   | 6-C#66c[#66c#6c]#6c[#6c1f]1h         | 2-fluoronaphthalen         |
| C(2)   | 6-C#6n[#66c1c]#6c[#6c1c]1h           | 1,3-dimethylquinolin-4-one |
| C(9)   | 66-C#6n[#6c1c]#66c[#6c#6c]#6c[#6c1h] | 1,3-dimethylquinolin-4-one |
| C(8)   | 6-C#66c[#6n#66c]#6c[#6c1n]1h         | 7-aminoquinolin-2-one      |
| C(7)   | 6-C#6c[#6c1f]#6c[#66c1h]1n           | 3-fluoronaphthalen-2-amine |
| C(16)  | C@6n1c1h1h                           | 1-ethylpylpyridine-2-one   |
| C(25)  | C1n1c1h1h                            | ethylamine                 |
| C(21)  | C1n1c1h1h                            | ethylamine                 |
| C(24)  | C1n1c1h1h                            | ethylamine                 |
| C(22)  | C1n1c1h1h                            | ethylamine                 |
| C(17)  | C1c1h1h1h                            | ethane                     |
| H(23A) | H1n[1c1c1h]                          | dimethylammonium           |
| H(23B) | H1n[1c1c1h]                          | dimethylammonium           |
| H(5)   | H@6c                                 | benzene                    |
| H(2)   | H@6c                                 | benzene                    |
| H(8)   | H@6c                                 | benzene                    |
| H(16A) | H1c[@6n1c1h]                         | 1-ethylpylpyridine-2-one   |
| H(16B) | H1c[@6n1c1h]                         | 1-ethylpylpyridine-2-one   |
| H(25A) | H1c[1n1c1h]                          | ethylamine                 |
| H(25B) | H1c[1n1c1h]                          | ethylamine                 |
| H(21A) | H1c[1n1c1h]                          | ethylamine                 |
| H(21B) | H1c[1n1c1h]                          | ethylamine                 |
| H(24A) | H1c[1n1c1h]                          | ethylamine                 |
| H(24B) | H1c[1n1c1h]                          | ethylamine                 |
| H(22A) | H1c[1n1c1h]                          | ethylamine                 |
| H(22B) | H1c[1n1c1h]                          | ethylamine                 |
| H(17A) | H1c[1c1h1h]                          | ethane                     |
| H(17B) | H1c[1c1h1h]                          | ethane                     |
| H(17C) | H1c[1c1h1h]                          | ethane                     |
| H(021) | H1o[1h]                              | water                      |
| H(022) | H1o[1h]                              | water                      |
| H(031) | H1o[1h]                              | water                      |
| H(032) | H1o[1h]                              | water                      |

Table 18: Aspherical atomic scattering factors for ofloxacin. Invariom names and corresponding model compounds from the invariom database are listed for all atoms.

| Atom  | Invariom Name                        | Model Compound                   |
|-------|--------------------------------------|----------------------------------|
| F(15) | F@6c                                 | 1-fluorobenzene                  |
| O(13) | O2c                                  | formaldehyde                     |
| O(14) | O@6c                                 | pyran-4-one ( $\gamma$ -pyrone)  |
| O(12) | O1c1h                                | methanol                         |
| O(16) | O@6c1c                               | anisole                          |
| N(1)  | 6-N#66c[#66c#6c]#6c[#6c1h]1c         | 1,3-dimethylquinolin-4-one       |
| N(20) | N@6c1c1c                             | <i>N,N</i> -dimethylbenzenamine  |
| N(23) | N1c1c1c                              | trimethylamine                   |
| C(2)  | 6-C#6n[#66c1c]#6c[#6c1c]1h           | 1,3-dimethylquinolin-4-one       |
| C(9)  | 66-C#6n[#6c1c]#66c[#6c#6c]#6c[#6c1o] | 8-hydroxy-1-methylquinolin-2-one |

| Atom   | Invariom Name                        | Model Compound                  |
|--------|--------------------------------------|---------------------------------|
| C(10)  | 66-C#66c[#6n#6c]#6c[2o#6c]#6c[#6c1h] | quinolin-4-one                  |
| C(11)  | C2o1o@6c                             | benzoic acid                    |
| C(3)   | 6-C#6c[2o#66c]#6c[#6n1h]1c           | 3-methylquinolin-4-one          |
| C(6)   | 6-C#6c[#6c1n]#6c[#66c1h]1f           | 3-fluoronaphthalen-2-amine      |
| C(5)   | 6-C#66c[#66c#6c]#6c[#6c1f]1h         | 2-fluoronaphthalen              |
| C(7)   | 6-C#6c[#6c1f]#6c[#66c1o]1n           | 2-amino-3-fluoronaphthalen-1-ol |
| C(8)   | 6-C#66c[#6n#66c]#6c[#6c1n]1o         | 7-amino-8-hydroxyquinolin-2-one |
| C(4)   | 6-C2o#66c[#66c#6c]#6c[#6c1c]         | 3-methyl-chromen-4-one          |
| C(24)  | C1n1c1h1h                            | ethylamine                      |
| C(21)  | C1n1c1h1h                            | ethylamine                      |
| C(22)  | C1n1c1h1h                            | ethylamine                      |
| C(18)  | C@6n1c1c1h                           | 1-isopropylpyridin-2-one        |
| C(17)  | C1o1c1h1h                            | ethanol                         |
| C(19)  | C1c1h1h1h                            | ethane                          |
| C(26)  | C1n1h1h1h                            | methylamine                     |
| C(25)  | C1n1c1h1h                            | ethylamine                      |
| H(2)   | H@6c                                 | benzene                         |
| H(12)  | H1o[1c]                              | methanol                        |
| H(5)   | H@6c                                 | benzene                         |
| H(24A) | H1c[1n1c1h]                          | ethylamine                      |
| H(24B) | H1c[1n1c1h]                          | ethylamine                      |
| H(21A) | H1c[1n1c1h]                          | ethylamine                      |
| H(21B) | H1c[1n1c1h]                          | ethylamine                      |
| H(22A) | H1c[1n1c1h]                          | ethylamine                      |
| H(22B) | H1c[1n1c1h]                          | ethylamine                      |
| H(18)  | H1c[@6n1c1c]                         | 1-isopropylpyridin-2-one        |
| H(17A) | H1c[1o1c1h]                          | ethanol                         |
| H(17B) | H1c[1o1c1h]                          | ethanol                         |
| H(19A) | H1c[1c1h1h]                          | ethane                          |
| H(19B) | H1c[1c1h1h]                          | ethane                          |
| H(19C) | H1c[1c1h1h]                          | ethane                          |
| H(26A) | H1c[1n1h1h]                          | methylamine                     |
| H(26B) | H1c[1n1h1h]                          | methylamine                     |
| H(26C) | H1c[1n1h1h]                          | methylamine                     |
| H(25A) | H1c[1n1c1h]                          | ethylamine                      |
| H(25B) | H1c[1n1c1h]                          | ethylamine                      |

Table 19: Aspherical atomic scattering factors for sparfloxacin 3 H<sub>2</sub>O. Invariom names and corresponding model compounds from the invariom database are listed for all atoms.

| Atom  | Invariom Name                 | Model Compound                  |
|-------|-------------------------------|---------------------------------|
| F(8)  | F@6c                          | 1-fluorobenzene                 |
| F(15) | F@6c                          | 1-fluorobenzene                 |
| O(12) | O1.5c[1.5o@6c]                | benzoic acid anion              |
| O(13) | O1.5c[1.5o@6c]                | benzoic acid anion              |
| O(14) | O@6c                          | pyran-4-one ( $\gamma$ -pyrone) |
| O(2)  | O1h1h                         | water                           |
| O(3)  | O1h1h                         | water                           |
| O(4)  | O1h1h                         | water                           |
| N(1)  | 6-N#66c[#66c#6c]#6c[#6c1h]@3c | 1-cyclopropylquinolin-4-one     |
| N(5)  | =-N@6c1h1h                    | 4-aminopyrimidin-2-one          |
| N(20) | N@6c1c1c                      | <i>N,N</i> -dimethylbenzenamine |

| Atom   | Invariom Name                         | Model Compound                       |
|--------|---------------------------------------|--------------------------------------|
| N(23)  | N1c1c1h1h                             | dimethylammonium                     |
| C(2)   | 6-C#6n[#66c@3c]#6c[#6c1c]1h           | 1-cyclopropyl-3-methylquinolin-4-one |
| C(3)   | 6-C#6c[2o#66c]#6c[#6n1h]1c            | 3-methylquinolin-4-one               |
| C(4)   | 6-C2o#66c[#66c#6c]#6c[#6c1c]          | 3-methyl-chromen-4-one               |
| C(10)  | 66-C#66c[#6n#6c]#6c[2o#6c]#6c[#6c1n]  | 5-aminoquinolin-4-one                |
| C(9)   | 66-C#6n[#6c@3c]#66c[#6c#6c]#6c[#6c1f] | 1-cyclopropyl-8-fluoroquinolin-2-one |
| C(8)   | 6-C#66c[#6n#66c]#6c[#6c1n]1f          | 7-amino-8-fluoroquinolin-2-one       |
| C(7)   | 6-C#6c[#66c1f]#6c[#6c1f]1n            | 1,3-difluoronaphthalen-2-amine       |
| C(6)   | 6-C#6c[#66c1n]#6c[#6c1n]1f            | 2-fluoronaphthalen-1,3-diamine       |
| C(5)   | 6-C#66c[#66c#6c]#6c[#6c1f]1n          | 2-fluoronaphthalen-1-amine           |
| C(21)  | C1n1c1h1h                             | ethylamine                           |
| C(22)  | C1n1c1c1h                             | 2-aminopropane                       |
| C(24)  | C1n1c1c1h                             | 2-aminopropane                       |
| C(25)  | C1n1c1h1h                             | ethylamine                           |
| C(27)  | C1c1h1h1h                             | ethane                               |
| C(26)  | C1c1h1h1h                             | ethane                               |
| C(16)  | 3-C#3c[#3c1h1h]#3c[#3c1h1h]@6n1h      | 1-cyclopropylpyridine-2-one          |
| C(17)  | 3-C#3c[#3c@6n1h]#3c[#3c1h1h]1h1h      | 1-cyclopropylpyridine-2-one          |
| C(18)  | 3-C#3c[#3c@6n1h]#3c[#3c1h1h]1h1h      | 1-cyclopropylpyridine-2-one          |
| C(11)  | C1.5o1.5o@6c                          | benzoic acid anion                   |
| H(52)  | H1n[@6c1h]                            | aniline                              |
| H(51)  | H1n[@6c1h]                            | aniline                              |
| H(23A) | H1n[1c1c1h]                           | dimethylammonium                     |
| H(23B) | H1n[1c1c1h]                           | dimethylammonium                     |
| H(2)   | H@6c                                  | benzene                              |
| H(21A) | H1c[1n1c1h]                           | ethylamine                           |
| H(21B) | H1c[1n1c1h]                           | ethylamine                           |
| H(22A) | H1c[1n1c1c]                           | 2-aminopropane                       |
| H(24A) | H1c[1n1c1c]                           | 2-aminopropane                       |
| H(251) | H1c[1n1c1h]                           | ethylamine                           |
| H(252) | H1c[1n1c1h]                           | ethylamine                           |
| H(27A) | H1c[1c1h1h]                           | ethane                               |
| H(27B) | H1c[1c1h1h]                           | ethane                               |
| H(27C) | H1c[1c1h1h]                           | ethane                               |
| H(26A) | H1c[1c1h1h]                           | ethane                               |
| H(26B) | H1c[1c1h1h]                           | ethane                               |
| H(26C) | H1c[1c1h1h]                           | ethane                               |
| H(16)  | H@3c                                  | cyclopropane                         |
| H(17A) | H@3c                                  | cyclopropane                         |
| H(17B) | H@3c                                  | cyclopropane                         |
| H(18A) | H@3c                                  | cyclopropane                         |
| H(18B) | H@3c                                  | cyclopropane                         |
| H(021) | H1o[1h]                               | water                                |
| H(022) | H1o[1h]                               | water                                |
| H(031) | H1o[1h]                               | water                                |
| H(032) | H1o[1h]                               | water                                |
| H(041) | H1o[1h]                               | water                                |
| H(042) | H1o[1h]                               | water                                |
